# Supplementary material for: Transcriptome sequencing and microarray design for functional genomics in the extremophile Arabidopsis relative Thellungiella salsuginea (Eutrema salsugineum)
Source: PubMed Central journal article supplement (PMC3832907; doi:10.1186/1471-2164-14-793), 2013-11-14
Supplement: 1471-2164-14-793-S2.pdf [file 1471-2164-14-793-S2.pdf]

**Additional file 2.**

| <b>AGI</b> | <b>MAPK</b> | <b>Contigs</b>                                                 |   |
|------------|-------------|----------------------------------------------------------------|---|
| AT3G45640  | ATMPK3      | thellun_all_c7986; thellun_all_c29917                          | A |
| AT2G43790  | ATMPK6      | thellun_all_c38895; thellun_all_c17154                         |   |
| AT4G01370  | ATMPK4      | thellun_all_c8037; thellun_all_c7456                           | B |
| AT4G11330  | ATMPK5      | thellun_all_c37344                                             |   |
| AT2G46070  | ATMPK12     | thellun_all_c28023                                             |   |
| AT1G10210  | ATMPK1      | thellun_all_rep_c12627                                         | C |
| AT1G59580  | ATMPK2      | thellun_all_c16994; thellun_all_c43504                         |   |
| AT2G18170  | ATMPK7      | thellun_all_rep_c16551; thellun_all_rep_c39120                 |   |
| AT1G18150  | ATMPK8      | thellun_all_rep_c15999; thellun_all_c29966                     | D |
| AT2G01450  | ATMPK17     | thellun_all_c22266; thellun_all_c5989; thellun_all_c22856      |   |
| AT1G53510  | ATMPK18     | thellun_all_c12164; thellun_all_c25005; thellun_all_c28956     |   |
| AT3G14720  | ATMPK19     | thellun_all_c34090; thellun_all_c33231; thellun_all_rep_c27519 |   |
| AT2G42880  | ATMPK20     | thellun_all_c7287                                              |   |

| <b>AGI</b> | <b>MAPKK</b> | <b>Contigs</b>                         |   |
|------------|--------------|----------------------------------------|---|
| AT4G26070  | ATMKK1       | thellun_all_c26223                     | A |
| AT4G29810  | ATMKK2       | thellun_all_c14205; thellun_all_c31759 |   |
| AT5G40440  | ATMKK3       | thellun_all_c19964                     | B |
| AT1G51660  | ATMKK4       | thellun_all_c13244; thellun_all_c21648 | C |
| AT3G21220  | ATMKK5       | thellun_all_c12458                     |   |
| AT1G73500  | ATMKK9       | thellun_all_rep_c5758                  | D |
