# Supplementary material for: Transcriptome sequencing and microarray design for functional genomics in the extremophile Arabidopsis relative Thellungiella salsuginea (Eutrema salsugineum)
Source: PubMed Central journal article supplement (PMC3832907; doi:10.1186/1471-2164-14-793), 2013-11-14
Supplement: 1471-2164-14-793-S3.pdf [file 1471-2164-14-793-S3.pdf]

**Additional file 3**

| PP2C      | Contigs                                                                                                                                                      |   |
|-----------|--------------------------------------------------------------------------------------------------------------------------------------------------------------|---|
| AT1G17550 | thellun_all_c15240; thellun_all_c8281                                                                                                                        | A |
| AT1G72770 | thellun_all_c42497; thellun_all_c35551; thellun_all_c35976; thellun_all_c12890                                                                               |   |
| AT4G26080 | thellun_all_c5358; thellun_all_rep_c30083; thellun_all_rep_c46466; thellun_all_rep_c46546; thellun_all_rep_c47056; thellun_all_rep_c2155; thellun_all_c10510 |   |
| AT5G57050 | thellun_all_c7659                                                                                                                                            |   |
| AT5G59220 | thellun_all_c10441; thellun_all_c39203                                                                                                                       |   |
| AT1G67820 | thellun_all_c29263; thellun_all_c11178                                                                                                                       | B |
| AT2G30020 | thellun_all_rep_c21558                                                                                                                                       | C |
| AT2G28890 | thellun_all_c12283; thellun_all_c43105                                                                                                                       |   |
| AT2G46920 | thellun_all_c32522                                                                                                                                           |   |
| AT3G16560 | thellun_all_c28902; thellun_all_rep_c29744; thellun_all_c20473; thellun_all_c40706; thellun_all_c8999                                                        | D |
| AT5G02400 | thellun_all_c33736                                                                                                                                           |   |
| AT3G12620 | thellun_all_c15921; thellun_all_rep_c8878; thellun_all_c15921                                                                                                |   |
| AT3G17090 | thellun_all_c17963; thellun_all_c20283; thellun_all_c31363                                                                                                   |   |
| AT4G33920 | thellun_all_c32155; thellun_all_c17437                                                                                                                       |   |
| AT5G02760 | thellun_all_rep_c5904; thellun_all_rep_c16851                                                                                                                |   |
| AT5G06750 | thellun_all_c19251                                                                                                                                           |   |
| AT5G66080 | thellun_all_c44914                                                                                                                                           | E |
| AT1G03590 | thellun_all_c40460                                                                                                                                           |   |
| AT1G16220 | thellun_all_c18413; thellun_all_rep_c12058                                                                                                                   |   |
| AT1G79630 | thellun_all_c44459; thellun_all_c32998; thellun_all_c28268                                                                                                   |   |
| AT2G20050 | thellun_all_c17905; thellun_all_c25830                                                                                                                       |   |
| AT3G02750 | thellun_all_rep_c12905                                                                                                                                       |   |
| AT3G05640 | thellun_all_c24920                                                                                                                                           |   |
| AT3G06270 | thellun_all_c8831; thellun_all_c43850                                                                                                                        |   |
| AT3G11410 | thellun_all_rep_c22578; thellun_all_rep_c5943                                                                                                                |   |
| AT3G16800 | thellun_all_c29733; thellun_all_rep_c6578; thellun_all_c17029                                                                                                |   |
| AT4G32950 | thellun_all_c38543; thellun_all_c22535; thellun_all_c9001; thellun_all_c37836                                                                                |   |
| AT5G26010 | thellun_all_c15738                                                                                                                                           |   |
| AT5G27930 | thellun_all_c24807; thellun_all_c8153; thellun_all_c24920                                                                                                    |   |
| AT5G36250 | thellun_all_c38545                                                                                                                                           |   |
| AT4G03415 | thellun_all_c30555                                                                                                                                           |   |
| AT1G22280 | thellun_all_rep_c4715                                                                                                                                        | F |
| AT1G34750 | thellun_all_c28124; thellun_all_c10309; thellun_all_c13443                                                                                                   |   |
| AT1G43900 | thellun_all_c7285                                                                                                                                            |   |
| AT1G78200 | thellun_all_c35162; thellun_all_c41399                                                                                                                       |   |
| AT2G20630 | thellun_all_rep_c4759; thellun_all_rep_c30416                                                                                                                |   |
| AT3G15260 | thellun_all_c15439; thellun_all_c23419; thellun_all_c6989                                                                                                    |   |
| AT3G51370 | thellun_all_rep_c6753; thellun_all_rep_c4470; thellun_all_c44914                                                                                             |   |
| AT4G28400 | thellun_all_rep_c11914; thellun_all_c18352                                                                                                                   |   |
| AT4G31750 | thellun_all_c13247; thellun_all_c30116; thellun_all_c24675; thellun_all_c19359                                                                               |   |
| AT5G10740 | thellun_all_rep_c16595                                                                                                                                       |   |
| AT5G53140 | thellun_all_c6492                                                                                                                                            |   |
| AT1G48040 | thellun_all_rep_c21154                                                                                                                                       |   |
| AT2G25620 | thellun_all_c14749                                                                                                                                           |   |
| AT2G33700 | thellun_all_c25164; thellun_all_c15172                                                                                                                       |   |
| AT3G51470 | thellun_all_c19337                                                                                                                                           |   |
| AT3G62260 | thellun_all_c23303; thellun_all_c13434                                                                                                                       |   |

| PP2C | Contigs |
|------|---------|
|------|---------|

|           |                                                            |   |
|-----------|------------------------------------------------------------|---|
| AT2G25070 | thellun_all_rep_c6528; thellun_all_c9380                   | I |
| AT4G31860 | thellun_all_c10464; thellun_all_c19719                     |   |
| AT3G63340 | thellun_all_c18912                                         | J |
| AT5G66720 | thellun_all_c8419                                          |   |
| AT2G30170 | thellun_all_rep_c7048; thellun_all_c28521                  | K |
| AT4G16580 | thellun_all_c25834; thellun_all_c14136; thellun_all_c35046 |   |
| AT2G40860 | thellun_all_c18071; thellun_all_c23308                     |   |
| AT4G27800 | thellun_all_rep_c6391; thellun_all_rep_c4376               |   |
| AT1G18030 | thellun_all_c37154                                         |   |
| AT4G33500 | thellun_all_rep_c15908; thellun_all_c20279                 |   |
