# Supplementary material for: Transcriptome sequencing and microarray design for functional genomics in the extremophile Arabidopsis relative Thellungiella salsuginea (Eutrema salsugineum)
Source: PubMed Central journal article supplement (PMC3832907; doi:10.1186/1471-2164-14-793), 2013-11-14
Supplement: 1471-2164-14-793-S4.pdf [file 1471-2164-14-793-S4.pdf]

#### Additional file 4

| <b>PTP</b> | <b>Contigs</b>                                           |
|------------|----------------------------------------------------------|
| AT1G71860  | thellun_all_c7717                                        |
|            |                                                          |
| <b>DSP</b> | <b>Contigs</b>                                           |
| AT3G09100  | thellun_all_c16852                                       |
| AT3G19420  | thellun_all_c27082; thellun_all_c7957; thellun_all_c8321 |
| AT4G03960  | thellun_all_c17019                                       |
| AT3G62010  | thellun_all_c27894                                       |
| AT1G05000  | thellun_all_rep_c5856                                    |
| AT2G04550  | thellun_all_rep_c40535; thellun_all_rep_c5958            |
| AT2G35680  | thellun_all_c12344; thellun_all_c7887; thellun_all_c8558 |
| AT3G02800  | thellun_all_c13438                                       |
| AT3G06110  | thellun_all_rep_c1481                                    |
| AT3G23610  | thellun_all_c14961                                       |
| AT5G16480  | thellun_all_c36563                                       |
| AT5G23720  | thellun_all_c20615; thellun_all_c33643                   |
| AT5G56610  | thellun_all_c6967                                        |
| AT3G50110  | thellun_all_c10116; thellun_all_c11894                   |
| AT5G58160  | thellun_all_c41093                                       |
| AT3G52180  | thellun_all_rep_c3791                                    |
| AT3G10940  | thellun_all_rep_c4495                                    |
| AT3G01510  | thellun_all_c19238; thellun_all_c37920                   |
