# Supplementary material for: Transcriptome sequencing and microarray design for functional genomics in the extremophile Arabidopsis relative Thellungiella salsuginea (Eutrema salsugineum)
Source: PubMed Central journal article supplement (PMC3832907; doi:10.1186/1471-2164-14-793), 2013-11-14

# Additional file 5

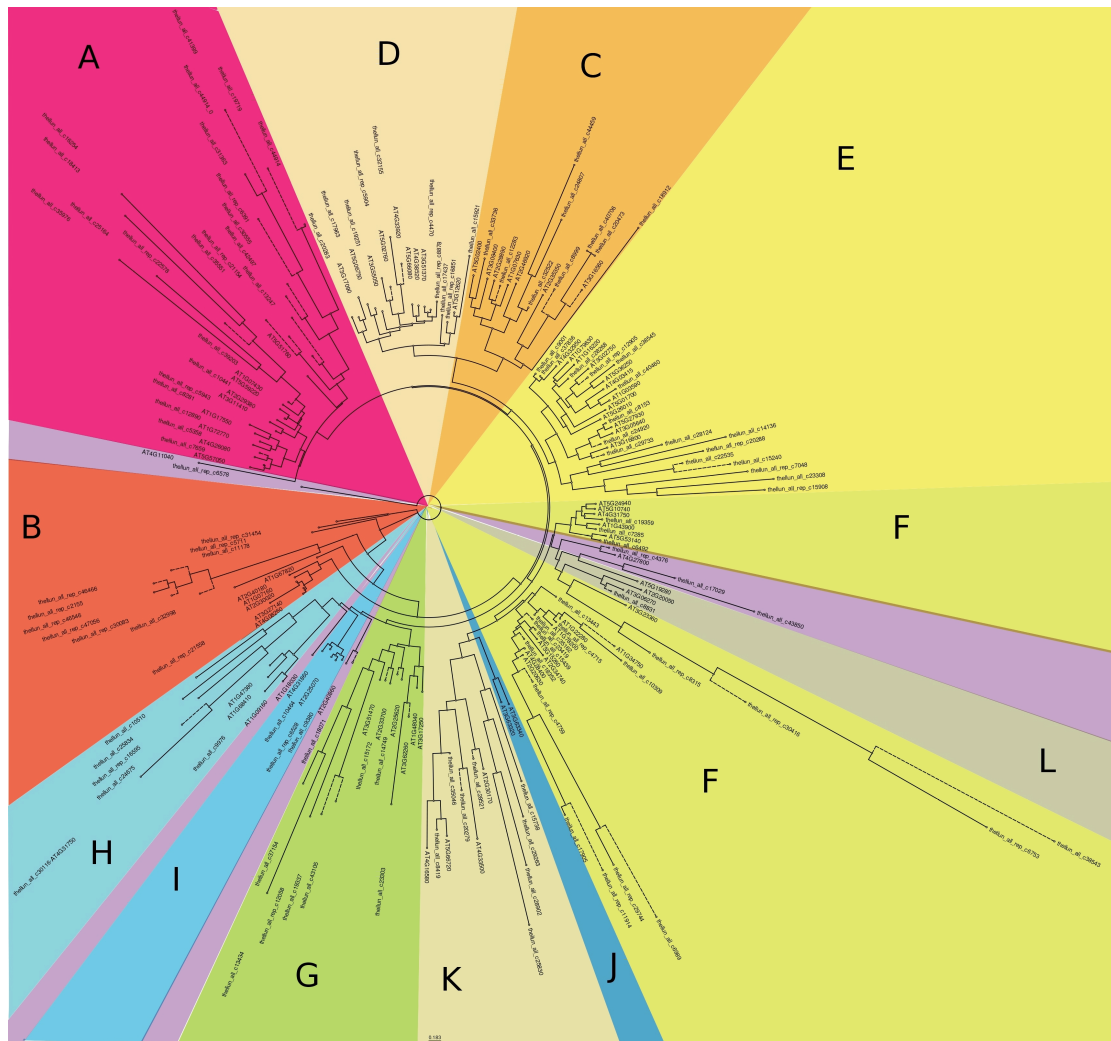

Supplement: 1471-2164-14-793-S5.pdf [file 1471-2164-14-793-S5.pdf]
