# Supplementary material for: Transcriptome sequencing and microarray design for functional genomics in the extremophile Arabidopsis relative Thellungiella salsuginea (Eutrema salsugineum)
Source: PubMed Central journal article supplement (PMC3832907; doi:10.1186/1471-2164-14-793), 2013-11-14
Supplement: 1471-2164-14-793-S11.pdf [file 1471-2164-14-793-S11.pdf]

## Additional file 11.

| Group | Ortholog of LEA proteins |                                                                                                           | Remark                                                                                                                                                                                                              |             |
|-------|--------------------------|-----------------------------------------------------------------------------------------------------------|---------------------------------------------------------------------------------------------------------------------------------------------------------------------------------------------------------------------|-------------|
|       | <i>Arabidopsis</i>       | <i>Thellungiella</i>                                                                                      |                                                                                                                                                                                                                     |             |
| LEA_1 | 6                        | <b>133</b>                                                                                                |                                                                                                                                                                                                                     |             |
|       | 18                       | <b>108</b>                                                                                                | complete cds: 108                                                                                                                                                                                                   |             |
|       | 46                       | <b>72, 110</b>                                                                                            |                                                                                                                                                                                                                     |             |
| LEA_2 | 1                        | <b>94, 106, 122, 153</b><br><b>123, 87, 105, 115, 154</b><br><b>196</b>                                   | 105 and 106 are different translated frames of thellun_all_rep_c15208; 122 and 123 are different translated frames of thellun_all_rep_c20993; 153 and 154 are different translated frames of thellun_all_rep_c28021 |             |
|       | 26                       | <b>63, 113</b><br><b>142, 114, 141</b>                                                                    | 113 and 114 are different translated frames of thellun_all_rep_c17285; 141 and 142 are different translated frames of thellun_all_rep_c26673                                                                        |             |
|       | 27                       | <b>60</b>                                                                                                 | complete cds: 60                                                                                                                                                                                                    |             |
|       | 2                        | <b>58</b>                                                                                                 |                                                                                                                                                                                                                     |             |
| LEA_3 | 37                       | <b>62</b>                                                                                                 |                                                                                                                                                                                                                     |             |
|       | 38                       | <b>52, 65, 88, 132, 155, 191</b>                                                                          | complete cds: 52                                                                                                                                                                                                    |             |
|       | 41                       | <b>54, 100, 121, 156</b>                                                                                  | complete cds: 54                                                                                                                                                                                                    |             |
| LEA_4 | 7                        | <b>149, 66, 67, 185, 189</b>                                                                              | complete cds: 149; 66 and 67 are different translated frames of thellun_all_rep_c4181                                                                                                                               |             |
|       | 9                        | <b>85</b><br><b>125, 86</b>                                                                               | 109 matched to AT22600( no lea); 85 and 86 are different translated frames of thellun_all_c8083                                                                                                                     |             |
|       | 11                       | <b>77</b>                                                                                                 |                                                                                                                                                                                                                     |             |
|       | 12                       | <b>75</b>                                                                                                 |                                                                                                                                                                                                                     |             |
|       | 13                       |                                                                                                           |                                                                                                                                                                                                                     |             |
|       | 19                       |                                                                                                           |                                                                                                                                                                                                                     |             |
|       | 23                       | <b>55, 74, 112, 187</b><br><b>145, 134, 135, 158, 197</b><br><b>157, 159</b><br><b>198, 137, 163, 164</b> | complete cds: 55, 198;<br>are different translated frames of thellun_all_rep_c34113                                                                                                                                 | 163 and 164 |
|       | 24                       | <b>168, 73, 139</b>                                                                                       |                                                                                                                                                                                                                     |             |
|       | 25                       | <b>144, 143</b>                                                                                           | 143 and 144 are different translated frames of thellun_all_c26853                                                                                                                                                   |             |
|       | 28                       |                                                                                                           | 102 matched to AT5G38760, 116 matched to AT5G53820. Both AT5G38760 and AT5G53820 were not annotated as LEA (Hundertmark and Hinch, 2008)                                                                            |             |
| 29    | <b>84, 83</b>            | 83 and 84 are different translated frames of thellun_all_rep_7426                                         |                                                                                                                                                                                                                     |             |
| 30    | <b>64</b>                | complete cds: 64                                                                                          |                                                                                                                                                                                                                     |             |
| 36    | <b>160</b>               |                                                                                                           |                                                                                                                                                                                                                     |             |
| 39    |                          |                                                                                                           |                                                                                                                                                                                                                     |             |
| 40    | <b>81</b>                | complete cds: 81                                                                                          |                                                                                                                                                                                                                     |             |
| 42    | <b>90, 91</b>            | 90 and 91 are different translated frames of thellun_all_c8752                                            |                                                                                                                                                                                                                     |             |
| 43    |                          |                                                                                                           |                                                                                                                                                                                                                     |             |
| 48    | <b>175</b>               |                                                                                                           |                                                                                                                                                                                                                     |             |

|          |    |                                                                                                                |                                                                                                                                                                                                                                                                                       |
|----------|----|----------------------------------------------------------------------------------------------------------------|---------------------------------------------------------------------------------------------------------------------------------------------------------------------------------------------------------------------------------------------------------------------------------------|
| LEA_5    | 20 |                                                                                                                |                                                                                                                                                                                                                                                                                       |
|          | 35 |                                                                                                                |                                                                                                                                                                                                                                                                                       |
| AtM      | 21 |                                                                                                                |                                                                                                                                                                                                                                                                                       |
|          | 22 | <b>93</b>                                                                                                      |                                                                                                                                                                                                                                                                                       |
| LEA_6    | 15 |                                                                                                                |                                                                                                                                                                                                                                                                                       |
|          | 16 | <b>177, 56, 82, 169, 184, 186</b>                                                                              | complete cds: 177                                                                                                                                                                                                                                                                     |
|          | 17 |                                                                                                                |                                                                                                                                                                                                                                                                                       |
| SMP      | 3  |                                                                                                                |                                                                                                                                                                                                                                                                                       |
|          | 31 | <b>148, 147</b>                                                                                                |                                                                                                                                                                                                                                                                                       |
|          | 32 | <b>146</b>                                                                                                     |                                                                                                                                                                                                                                                                                       |
|          | 47 | <b>165</b>                                                                                                     | 146, 147, 148 are translated frames of thellun_all_c27216                                                                                                                                                                                                                             |
|          | 49 |                                                                                                                |                                                                                                                                                                                                                                                                                       |
|          | 50 |                                                                                                                |                                                                                                                                                                                                                                                                                       |
| dehydrin | 4  | <b>59, 120, 138, 162, 174, 179, 192</b><br><b>126, 61, 126, 150, 161, 166, 178</b><br><b>195, 99, 104, 190</b> | 161 and 162 are different translated frames of thellun_all_rep_c32321; 178 and 179 are different translated frames of thellun_all_rep_c41511                                                                                                                                          |
|          | 5  | <b>95, 97, 151, 173, 176, 194</b><br><b>124, 111, 118, 131, 152</b><br><b>130, 119, 170, 193</b>               | 192 and 193 are different translated frames of cluster216; 194 and 195 are different translated frames of cluster331                                                                                                                                                                  |
|          | 8  | <b>78, 53, 107, 127</b><br><b>98, 70, 117, 180</b>                                                             |                                                                                                                                                                                                                                                                                       |
|          | 10 | <b>181</b><br><b>199, 68, 69, 76, 92, 101, 128, 140, 171, 182, 188</b>                                         | complete cds: 199. Sequence 71 is translated frame +1 of thellun_all_rep_c5017 and clustered close to sequence 10. It is highly similar to mitochondrial lipoamide dehydrogenase 1 (AT1G48030) and likely not a LEA ortholog, hereby not represented as ortholog of #10 in the Table. |
|          | 14 | <b>89</b>                                                                                                      |                                                                                                                                                                                                                                                                                       |
|          | 33 |                                                                                                                |                                                                                                                                                                                                                                                                                       |
|          | 34 | <b>80</b>                                                                                                      |                                                                                                                                                                                                                                                                                       |
|          | 44 | <b>103</b>                                                                                                     |                                                                                                                                                                                                                                                                                       |
|          | 45 |                                                                                                                |                                                                                                                                                                                                                                                                                       |
|          | 51 | <b>57, 79, 129, 183</b><br>136<br>167<br>172                                                                   | complete cds: 57                                                                                                                                                                                                                                                                      |

Putative *Thellungiella* LEA proteins were identified by reciprocal BLASTX ( $E < 10^{-10}$ ) searches of all *T. salsuginea* unigenes against the 51 *Arabidopsis* LEA proteins and resulted in 148 protein sequences as shown in Supplemental Table S2. Empty cells indicate no orthologous protein was found for *T. salsuginea* in the sequence assembly. Cds, coding sequence.
