# Supplementary material for: Transcriptome sequencing and microarray design for functional genomics in the extremophile Arabidopsis relative Thellungiella salsuginea (Eutrema salsugineum)
Source: PubMed Central journal article supplement (PMC3832907; doi:10.1186/1471-2164-14-793), 2013-11-14
Supplement: 1471-2164-14-793-S12.pdf [file 1471-2164-14-793-S12.pdf]

**Additional file 12.** Characteristics of the *T. salsuginea* LEA proteins.

| # <sup>1</sup> | AGI code  | group <sup>2</sup> | GRAVY <sup>2</sup> | Localization <sup>2</sup> | Thellungiella orthologous <sup>3</sup> | # <sup>1</sup> | GRAVY <sup>4</sup> | Localization <sup>4</sup> |
|----------------|-----------|--------------------|--------------------|---------------------------|----------------------------------------|----------------|--------------------|---------------------------|
| 1              | At1g01470 | LEA_2              | 0.056              | other                     | thellun_all_rep_c9292_3                | 94             | 0.648              | other                     |
|                |           |                    |                    |                           | thellun_all_rep_c20993_3               | 123            | -0.191             | other                     |
|                |           |                    |                    |                           | cluster349_3                           | 196            | -0.022             | other                     |
| 2              | At1g02820 | LEA_3              | -0.491             | Chloroplast               | thellun_all_rep_c1937_3                | 58             | -0.437             | Mitochondrion             |
| 3              | At1g03120 | SMP                | -0.564             | other                     |                                        |                |                    |                           |
| 4              | At1g20440 | dehydrin           | -1.257             | other                     | thellun_all_rep_c2030_1                | 59             | -1.338             | other                     |
|                |           |                    |                    |                           | thellun_all_rep_c21860_1               | 126            | -1.176             | other                     |
|                |           |                    |                    |                           | cluster331_2                           | 195            | -1.484             | other                     |
| 5              | At1g20450 | dehydrin           | -1.34              | other                     | thellun_all_rep_c11602_3               | 95             | -1.169             | other                     |
|                |           |                    |                    |                           | thellun_all_rep_c21096_3               | 124            | -1.683             | other                     |
|                |           |                    |                    |                           | thellun_all_rep_c23744_3               | 130            | -1.433             | other                     |
| 6              | At1g32560 | LEA_1              | -1.042             | other                     | thellun_all_c24961_1                   | 133            | -0.997             | other                     |
| 7              | At1g52690 | LEA_4              | -1.317             | other                     | thellun_all_rep_c27290_2               | 149            | -1.487             | other                     |
| 8              | At1g54410 | dehydrin           | -1.868             | other                     | thellun_all_rep_c6337_2                | 78             | -1.254             | other                     |
| 9              | At1g72100 | LEA_4              | -0.46              | secreted                  | thellun_all_c8083_2                    | 85             | -0.424             | other                     |
|                |           |                    |                    |                           | thellun_all_c21843_1                   | 125            | -0.495             | secreted                  |
| 10             | At1g76180 | dehydrin           | -1.265             | other                     | thellun_all_rep_c13061_2               | 98             | -0.979             | other                     |
|                |           |                    |                    |                           | thellun_all_rep_c45204_1               | 181            | -0.662             | secreted                  |
|                |           |                    |                    |                           | cluster597_1                           | <b>199</b>     | -1.249             | other                     |
| 11             | At2g03740 | LEA_4              | -0.703             | Chloroplast               | thellun_all_rep_c6079_3                | 77             | -0.391             | Chloroplast               |
| 12             | At2g03850 | LEA_4              | -0.496             | Chloroplast               | thellun_all_rep_c5402_1                | 75             | -0.686             | Chloroplast               |
| 13             | At2g18340 | LEA_4              | -0.93              | secreted                  |                                        |                |                    |                           |
| 14             | At2g21490 | dehydrin           | -1.032             | other                     | thellun_all_rep_c8639_3                | 89             | -0.733             | other                     |
| 15             | At2g23110 | PvLEA18            | -1.059             | other                     |                                        |                |                    |                           |
| 16             | At2g23120 | PvLEA18            | -1.001             | other                     | thellun_all_rep_c40374_3               | <b>177</b>     | -1.065             | other                     |
| 17             | At2g33690 | PvLEA18            | -1.311             | other                     |                                        |                |                    |                           |
| 18             | At2g35300 | LEA_1              | -1.156             | other                     | thellun_all_rep_c15526_6               | <b>108</b>     | -1.287             | other                     |
| 19             | At2g36640 | LEA_4              | -1.023             | other                     |                                        |                |                    |                           |
| 20             | At2g40170 | LEA_5              | -1.407             | other                     |                                        |                |                    |                           |
| 21             | At2g41260 | AtM                | -0.704             | secreted                  |                                        |                |                    |                           |
| 22             | At2g41280 | AtM                | -0.011             | secreted                  | thellun_all_c9151_1                    | 93             | 0.001              | secreted                  |
|                |           |                    |                    |                           | thellun_all_rep_c1044_2                | <b>55</b>      | -0.594             | Chloroplast               |
|                |           |                    |                    |                           | thellun_all_rep_c26948_3               | 145            | -0.757             | Mitochondrion             |
|                |           |                    |                    |                           | thellun_all_rep_c29067_1               | 157            | -0.361             | Chloroplast               |
|                |           |                    |                    |                           | cluster504_3                           | <b>198</b>     | -0.414             | Chloroplast               |
| 24             | At2g42540 | LEA_4              | -0.554             | Chloroplast               | thellun_all_rep_c36160_3               | 168            | -1.07              | other                     |
| 25             | At2g42560 | LEA_4              | -0.978             | other                     | thellun_all_c26853_3                   | 144            | -1.347             | other                     |
| 26             | At2g44060 | LEA_2              | -0.314             | other                     | thellun_all_rep_c2225_3                | 63             | 0.141              | other                     |
|                |           |                    |                    |                           | thellun_all_rep_c26673_2               | 142            | 0.239              | secreted                  |
| 27             | At2g46140 | LEA_2              | 0.123              | other                     | thellun_all_rep_c2057_1                | <b>60</b>      | 0.057              | other                     |
| 28             | At3g02480 | LEA_4              | -1.213             | other                     |                                        |                |                    |                           |
| 29             | At3g15670 | LEA_4              | -1.369             | other                     | thellun_all_rep_c7426_3                | 84             | -1.604             | other                     |
| 30             | At3g17520 | LEA_4              | -1.047             | secreted                  | thellun_all_rep_c3347_2                | <b>64</b>      | -1.177             | secreted                  |
| 31             | At3g22490 | SMP                | -0.193             | other                     | thellun_all_c27216_3                   | 148            | 0.334              | other                     |
| 32             | At3g22500 | SMP                | -0.341             | other                     | thellun_all_c27216_1                   | 146            | -0.619             | other                     |
| 33             | At3g50970 | dehydrin           | -1.173             | other                     |                                        |                |                    |                           |
| 34             | At3g50980 | dehydrin           | -1.053             | other                     | thellun_all_c7357_1                    | 80             | -0.898             | Chloroplast               |
| 35             | At3g51810 | LEA_5              | -1.468             | other                     |                                        |                |                    |                           |
| 36             | At3g53040 | LEA_4              | -1.194             | other                     | thellun_all_c32122_2                   | 160            | -0.848             | other                     |
| 37             | At3g53770 | LEA_3              | -0.79              | Mitochondrion             | thellun_all_rep_c2197_2                | 62             | -0.803             | Mitochondrion             |
| 38             | At4g02380 | LEA_3              | -0.36              | Chloroplast               | thellun_all_rep_c246_1                 | <b>52</b>      | -0.466             | Chloroplast               |

|    |           |          |        |               |                          |           |        |               |
|----|-----------|----------|--------|---------------|--------------------------|-----------|--------|---------------|
| 39 | At4g13230 | LEA_4    | -0.831 | Mitochondrion |                          |           |        |               |
| 40 | At4g13560 | LEA_4    | -1.181 | other         | thellun_all_c7405_1      | <b>81</b> | -1.183 | other         |
| 41 | At4g15910 | LEA_3    | -0.526 | Chloroplast   | thellun_all_rep_c863_2   | <b>54</b> | -0.451 | Chloroplast   |
| 42 | At4g21020 | LEA_4    | -1.291 | Mitochondrion | thellun_all_c8752_1      | 90        | -1.773 | other         |
| 43 | At4g36600 | LEA_4    | -1.072 | Mitochondrion |                          |           |        |               |
| 44 | At4g38410 | dehydrin | -1.629 | other         | thellun_all_c14197_2     | 103       | -1.156 | other         |
| 45 | At4g39130 | dehydrin | -0.774 | other         |                          |           |        |               |
| 46 | At5g06760 | LEA_1    | -0.815 | other         | thellun_all_rep_c5248_2  | <b>72</b> | -0.81  | other         |
| 47 | At5g27980 | SMP      | -0.373 | other         | thellun_all_c34179_3     | 165       | -0.864 | other         |
| 48 | At5g44310 | LEA_4    | -1.409 | Chloroplast   | thellun_all_c38897_1     | 175       | -0.914 | Mitochondrion |
| 49 | At5g53260 | SMP      | -0.273 | Chloroplast   |                          |           |        |               |
| 50 | At5g53270 | SMP      | -0.103 | other         |                          |           |        |               |
|    |           |          |        |               | thellun_all_rep_c1101_3  | <b>57</b> | -1.018 | other         |
| 51 | At5g66400 | dehydrin | -1.182 | other         | thellun_all_rep_c25754_3 | 136       | -1.396 | other         |
|    |           |          |        |               | thellun_all_rep_c35985_1 | 167       | -1.221 | other         |
|    |           |          |        |               | thellun_all_rep_c36886_2 | 172       | -0.926 | other         |

<sup>1</sup>Protein sequence number as defined in Supplemental Table 2.

<sup>2</sup>The protein family domains, GRAVY (grand average of hydropathy), and predicted subcellular localization for *Arabidopsis* LEA proteins were obtained from Hundertmark and Hincha (2008).

<sup>3</sup>Representative of putative *T. salsuginea* LEA proteins that showed distinct sequence models.

<sup>4</sup>GRAVY quantitates the hydrophilicity of proteins based on amino acid composition using the protparam algorithm (<http://web.expasy.org/protparam/>). Subcellular localization was predicted from protein sequence analysis using the targetP algorithm.

Empty cells indicate no orthologous protein was found for *T. salsuginea* in the sequence assembly.

Bold numbers indicate complete coding region for *Arabidopsis* and predicted to be complete coding region for *T. salsuginea* based on protein sequence alignment between the two species.
