# Supplementary material for: Transcriptome sequencing and microarray design for functional genomics in the extremophile Arabidopsis relative Thellungiella salsuginea (Eutrema salsugineum)
Source: PubMed Central journal article supplement (PMC3832907; doi:10.1186/1471-2164-14-793), 2013-11-14
Supplement: 1471-2164-14-793-S15.pdf [file 1471-2164-14-793-S15.pdf]

## Additional file 15.

| Type of array                                | <i>Arabidopsis</i> | <i>Arabidopsis</i> | <i>Thellungiella</i> | <i>Thellungiella</i> |
|----------------------------------------------|--------------------|--------------------|----------------------|----------------------|
| Hybridized RNA sample <sup>1</sup>           | Col-0              | Yukon              | Col-0                | Yukon                |
| Number of probes <sup>2</sup>                | 37148 ± 5183       | 21129 ± 3846       | 43553 ± 1588         | 45017 ± 166          |
| Differentially expressed probes <sup>3</sup> | 623                | 3336               | 548                  | 10248                |
| Unique AGI locus                             | 512                | 2722               | 321 <sup>#</sup>     | 4425 <sup>#</sup>    |

<sup>1</sup>Source of RNA samples. Altogether 6 hybridizations with RNA derived from leaves of three biological replicates from non-acclimated or cold acclimated plants.

<sup>2</sup>Mean of six hybridizations ± standard deviation. Number of probes with hybridization signal intensities at least 1.5-fold above background.

<sup>3</sup>Differentially expressed probes were identified using a linear model in the LIMMA package and false discovery rate ( $p < 0.05$ ) controlled by Benjamini and Hochberg (1995) method implemented in the Robin software.

<sup>#</sup>Orthologous genes were identified based on protein sequence similarity search using BLASTX,  $E < 10^{-10}$ .
