# Supplementary material for: Transcriptome sequencing and microarray design for functional genomics in the extremophile Arabidopsis relative Thellungiella salsuginea (Eutrema salsugineum)
Source: PubMed Central journal article supplement (PMC3832907; doi:10.1186/1471-2164-14-793), 2013-11-14
Supplement: 1471-2164-14-793-S16.pdf [file 1471-2164-14-793-S16.pdf]

## Additional file 16.

| Mapman functional group            | Up-regulated                 |                              |                              |                              | Down-regulated               |                              |                              |                              |
|------------------------------------|------------------------------|------------------------------|------------------------------|------------------------------|------------------------------|------------------------------|------------------------------|------------------------------|
|                                    | Yukon                        |                              | Col-0                        |                              | Yukon                        |                              | Col-0                        |                              |
|                                    | Number of genes <sup>1</sup> | <i>p</i> -value <sup>2</sup> | Number of genes <sup>1</sup> | <i>p</i> -value <sup>2</sup> | Number of genes <sup>1</sup> | <i>p</i> -value <sup>2</sup> | Number of genes <sup>1</sup> | <i>p</i> -value <sup>2</sup> |
| Photosynthesis                     | 12                           | <b><i>3.46E-041</i></b>      | 1                            | 6.53E-001                    | 502                          | <b><i>1.49E-129</i></b>      | 13                           | <b><i>1.78E-004</i></b>      |
| Major CHO metabolism               | 24                           | 9.90E-002                    | 9                            | <b><i>1.55E-004</i></b>      | 23                           | 5.10E-001                    | 2                            | 5.35E-001                    |
| Minor CHO metabolism               | 21                           | 7.61E-001                    | 3                            | 3.82E-001                    | 14                           | 1.35E-001                    | 1                            | 1.00E+000                    |
| Glycolysis                         | 51                           | <b><i>4.45E-012</i></b>      | 2                            | 3.51E-001                    | 19                           | 9.46E-001                    | 1                            | 7.34E-001                    |
| Fermentation                       | 11                           | <b><i>1.46E-002</i></b>      | 3                            | <b><i>9.67E-003</i></b>      | 5                            | 1.00E+000                    | ND                           | NA                           |
| Gluconeogenese/ glyoxylate cycle   | 6                            | 7.87E-002                    | ND                           | NA                           | 2                            | 1.00E+000                    | ND                           | NA                           |
| Oxidative pentose phosphate cycle  | 11                           | 1.39E-001                    | ND                           | NA                           | 13                           | 7.61E-002                    | ND                           | NA                           |
| TCA / organic acids transformation | 22                           | 2.74E-001                    | 2                            | 3.77E-001                    | 45                           | <b><i>7.03E-007</i></b>      | 8                            | <b><i>1.78E-004</i></b>      |
| Mitochondrial electron transport   | 16                           | <b><i>4.08E-002</i></b>      | 1                            | 1.00E+000                    | 12                           | <b><i>1.82E-005</i></b>      | 1                            | 1.00E+000                    |
| Cell wall                          | 60                           | 5.13E-001                    | 6                            | 7.53E-001                    | 160                          | <b><i>1.38E-026</i></b>      | 3                            | 6.49E-001                    |
| Lipid metabolism                   | 70                           | 8.40E-001                    | 6                            | 6.06E-001                    | 133                          | <b><i>2.92E-007</i></b>      | 6                            | 6.34E-001                    |
| Nitrogen metabolism                | 10                           | 5.85E-001                    | 2                            | 1.57E-001                    | 24                           | <b><i>5.30E-005</i></b>      | 2                            | 1.79E-001                    |
| Amino acid metabolism              | 60                           | 7.84E-001                    | 4                            | 6.76E-001                    | 115                          | <b><i>4.34E-007</i></b>      | 3                            | 1.00E+000                    |
| Sulfur assimilation                | ND                           | NA                           | ND                           | NA                           | 12                           | <b><i>1.56E-004</i></b>      | ND                           | NA                           |
| Metal handling                     | 32                           | <b><i>5.06E-004</i></b>      | ND                           | NA                           | 14                           | 4.37E-001                    | ND                           | NA                           |
| Secondary metabolism               | 62                           | 1.02E-001                    | 10                           | 1.26E-001                    | 80                           | <b><i>1.82E-002</i></b>      | 4                            | 1.00E+000                    |
| Hormone metabolism                 | 62                           | 1.00E+000                    | 3                            | 6.35E-001                    | 152                          | <b><i>4.45E-015</i></b>      | 19                           | <b><i>1.19E-004</i></b>      |
| Cofactor and vitamine metabolism   | 13                           | 8.32E-001                    | ND                           | NA                           | 9                            | 3.04E-001                    | 1                            | 6.09E-001                    |
| Tetrapyrrole synthesis             | 2                            | <b><i>1.97E-002</i></b>      | ND                           | NA                           | 35                           | <b><i>5.31E-008</i></b>      | 2                            | 2.61E-001                    |
| Stress                             | 212                          | <b><i>6.16E-012</i></b>      | 10                           | 9.64E-001                    | 191                          | <b><i>2.08E-002</i></b>      | 5                            | 1.79E-001                    |
| Redox regulation                   | 43                           | 7.23E-001                    | 1                            | 8.18E-001                    | 60                           | 1.00E+000                    | 5                            | 2.61E-001                    |
| Polyamine metabolism               | 13                           | <b><i>7.68E-007</i></b>      | ND                           | NA                           | ND                           | NA                           | ND                           | NA                           |
| Nucleotide metabolism              | 27                           | 6.90E-001                    | 2                            | 7.73E-001                    | 20                           | 1.73E-001                    | 1                            | 1.00E+000                    |
| Biodegradation of Xenobiotics      | 18                           | <b><i>1.58E-007</i></b>      | ND                           | NA                           | 2                            | 4.04E-001                    | ND                           | NA                           |
| C1 metabolism                      | 6                            | 1.00E+000                    | ND                           | NA                           | 8                            | 9.70E-001                    | 1                            | 5.38E-001                    |
| Misc                               | 247                          | <b><i>5.57E-005</i></b>      | 37                           | <b><i>2.26E-005</i></b>      | 392                          | <b><i>2.06E-025</i></b>      | 26                           | 5.62E-002                    |
| RNA                                | 350                          | 4.81E-001                    | 18                           | 1.27E-001                    | 303                          | <b><i>1.65E-008</i></b>      | 26                           | 6.96E-001                    |
| DNA                                | 34                           | <b><i>4.63E-005</i></b>      | 3                            | <b><i>2.88E-002</i></b>      | 42                           | <b><i>9.46E-007</i></b>      | 1                            | <b><i>1.27E-003</i></b>      |
| Protein                            | 552                          | 7.55E-001                    | 25                           | 1.08E-001                    | 375                          | <b><i>1.32E-049</i></b>      | 30                           | 2.98E-001                    |
| Signalling                         | 162                          | 6.04E-001                    | 11                           | 9.64E-001                    | 177                          | 5.93E-001                    | 16                           | 5.05E-001                    |
| Cell                               | 92                           | 3.14E-001                    | 5                            | 6.04E-001                    | 130                          | 9.77E-001                    | 4                            | 3.86E-001                    |
| Micro RNA, natural antisense, etc  | ND                           | NA                           | 2                            | 1.00E+000                    | ND                           | NA                           | 3                            | 6.34E-001                    |
| Development                        | 109                          | <b><i>2.42E-002</i></b>      | 6                            | 1.00E+000                    | 83                           | 7.04E-002                    | 2                            | 1.81E-001                    |
| Transport                          | 164                          | <b><i>1.97E-002</i></b>      | 21                           | <b><i>2.34E-002</i></b>      | 179                          | 3.70E-001                    | 8                            | 6.68E-001                    |
| Not assigned                       | 2016                         | <b><i>5.01E-007</i></b>      | 100                          | 3.06E-001                    | 2379                         | <b><i>3.45E-021</i></b>      | 117                          | 9.75E-001                    |

<sup>1</sup>Number of genes was found in each significant gene lists identified from the respective RNA hybridized to species-specific arrays.

<sup>2</sup>*p*-value from Fisher's exact test with false discovery rate controlled by Benjamini and Hochberg (1995) method. *P*-values highlighted in bold and italic were significant ( $p < 0.05$ ) for the proportion of genes in a functional group that was over- or under-represented, respectively, in the respective gene list compared to all corresponding genes represented on the array.

ND, not detected; NA, not available.
